# Supplementary material
Source: PubMed Central journal article supplement (PMC1861260)
Supplement: heart_92_11_1707__1.pdf [file heart_92_11_1707__1.pdf]

## Treating patients with ventricular ectopic beats

GA Ng

### Web only refs

1. Kostis JB. The prognostic significance of ventricular ectopic activity. *Am J Cardiol* 1992;**70**:807–8.
2. Lown B, Fakhro AM, Hood WB Jr, *et al.* The coronary care unit. New perspectives and directions. *JAMA* 1967;**199**:188–98.
3. Kennedy HL. Benign ventricular ectopic activity: evolving insights. *Cardiac Electrophysiology Review* 2001;**5**:319–22.
4. Kostis JB, McCrone K, Moreyra AE, *et al.* Premature ventricular complexes in the absence of identifiable heart disease. *Circulation* 1981;**63**:1351–6.
5. Kennedy HL, Whitlock JA, Sprague MK, *et al.* Long-term follow-up of asymptomatic healthy subjects with frequent and complex ventricular ectopy. *N Engl J Med* 1985;**312**:193–7.
6. Bigger JT Jr, Fleiss JL, Kleiger R, *et al.* The relationships among ventricular arrhythmias, left ventricular dysfunction, and mortality in the 2 years after myocardial infarction. *Circulation* 1984;**69**:250–8.
7. Abdalla IS, Prineas RJ, Neaton JD, *et al.* Relation between ventricular premature complexes and sudden cardiac death in apparently healthy men. *Am J Cardiol* 1987;**60**:1036–42.
8. Bikkina M, Larson MG, Levy D. Prognostic implications of asymptomatic ventricular arrhythmias: the Framingham Heart Study. *Ann Intern Med* 1992;**117**:990–6.
9. Kostis JB, Allen R, Berkson DM, *et al.* Correlates of ventricular ectopic activity in isolated systolic hypertension. SHEP Cooperative Research Group. *Am Heart J* 1994;**127**:112–21.
10. Fleg JL, Kennedy HL. Long-term prognostic significance of ambulatory electrocardiographic findings in apparently healthy subjects greater than or equal to 60 years of age. *Am J Cardiol* 1992;**70**:748–51.
11. The Cardiac Arrhythmia Suppression Trial (CAST) Investigators. Preliminary report: Effect of encainide and flecainide on mortality in a randomized trial of arrhythmia suppression after myocardial infarction. *N Engl J Med* 1989;**321**:406–12.
12. Messerli FH, Ventura HO, Elizardi DJ, *et al.* Hypertension and sudden death. Increased ventricular ectopic activity in left ventricular hypertrophy. *Am J Med* 1984;**77**:18–22.
13. Crow RS, Prineas RJ, Dias V, *et al.* Ventricular premature beats in a population sample. Frequency and associations with coronary risk characteristics. *Circulation* 1975;**52**:III211–III215.
14. Simpson RJ Jr, Cascio WE, Schreiner PJ, *et al.* Prevalence of premature ventricular contractions in a population of African American and white men and women: the Atherosclerosis Risk in Communities (ARIC) study. *Am Heart J* 2002;**143**:535–40.
15. Gordon T, Kannel WB. Premature mortality from coronary heart disease. The Framingham study. *JAMA* 1971;**215**:1617–25.
16. Simpson RJ Jr, Cascio WE, Crow RS, *et al.* Association of ventricular premature complexes with electrocardiographic-estimated left ventricular mass in a population of

African-American and white men and women (The Atherosclerosis Risk in Communities [ARIC] Study). *Am J Cardiol* 2001;**87**:49–53.

17. Almendral J, Villacastin JP, Arenal A, *et al.* Evidence favoring the hypothesis that ventricular arrhythmias have prognostic significance in left ventricular hypertrophy secondary to systemic hypertension. *Am J Cardiol* 1995;**76**:60D–3D.
18. Becker R, Haass M, Ick D, *et al.* Role of nonsustained ventricular tachycardia and programmed ventricular stimulation for risk stratification in patients with idiopathic dilated cardiomyopathy. *Basic Res Cardiol* 2003;**98**:259–66.
19. Mehta A, Jain AC, Mehta MC, *et al.* Caffeine and cardiac arrhythmias. An experimental study in dogs with review of literature. *Acta Cardiol* 1997;**52**:273–83.
20. Prineas RJ, Jacobs DR Jr, Crow RS, *et al.* Coffee, tea and VPB. *J Chronic Dis* 1980;**33**:67–72.
21. Dobmeyer DJ, Stine RA, Leier CV, *et al.* The arrhythmogenic effects of caffeine in human beings. *N Engl J Med* 1983;**308**:814–6.
22. Myers MG. Caffeine and cardiac arrhythmias. *Chest* 1988;**94**:4–5.
23. Graboys TB, Blatt CM, Lown B. The effect of caffeine on ventricular ectopic activity in patients with malignant ventricular arrhythmia. *Arch Intern Med* 1989;**149**:637–9.
24. Newby DE, Neilson JM, Jarvie DR, *et al.* Caffeine restriction has no role in the management of patients with symptomatic idiopathic ventricular premature beats. *Heart* 1996;**76**:355–7.
25. DeBacker G, Jacobs D, Prineas R, *et al.* Ventricular premature contractions: a randomized non-drug intervention trial in normal men. *Circulation* 1979;**59**:762–9.
26. Bourne G. An attempt at the clinical classification of premature ventricular beats. *Q J Med* 1927;**20**:219–43.
27. McHenry PL, Morris SN, Kavalier M, *et al.* Comparative study of exercise-induced ventricular arrhythmias in normal subjects and patients with documented coronary artery disease. *Am J Cardiol* 1976;**37**:609–16.
28. Busby MJ, Shefrin EA, Fleg JL. Prevalence and long-term significance of exercise-induced frequent or repetitive ventricular ectopic beats in apparently healthy volunteers. *J Am Coll Cardiol* 1989;**14**:1659–65.
29. Jouven X, Zureik M, Desnos M, *et al.* Long-term outcome in asymptomatic men with exercise-induced premature ventricular depolarizations. *N Engl J Med* 2000;**343**:826–33.
30. Morshedi-Meibodi A, Evans JC, Levy D, *et al.* Clinical correlates and prognostic significance of exercise-induced ventricular premature beats in the community: the Framingham Heart Study. *Circulation* 2004;**109**:2417–22.
31. Frolkis JP, Pothier CE, Blackstone EH, Lauer MS. Frequent ventricular ectopy after exercise as a predictor of death. *N Engl J Med* 2003;**348**:781–90.
32. O'Neill JO, Young JB, Pothier CE, *et al.* Severe frequent ventricular ectopy after exercise as a predictor of death in patients with heart failure. *J Am Coll Cardiol* 2004;**44**:820–6.
33. Ng GA, Brack KE, Coote JH. Autonomic modulation of electrical restitution and ventricular fibrillation initiation in isolated rabbit hearts. *Journal of Physiology-London* 2001;**533**:45P–6P.
34. Jouven X, Ducimetiere P. Exercise testing: do frequent premature ventricular depolarizations represent a new criterion of positivity? *Eur Heart J* 2001;**22**:1759–61.

35. Joshi S, Wilber DJ. Ablation of idiopathic right ventricular outflow tract tachycardia: current perspectives. *J Cardiovasc Electrophysiol* 2005;**16**(Suppl 1):S52–S58.
36. Lerman BB, Stein K, Engelstein ED, *et al.* Mechanism of repetitive monomorphic ventricular tachycardia. *Circulation* 1995;**92**:421–9.
37. Fontaine G, Fontaliran F, Hebert JL, *et al.* Arrhythmogenic right ventricular dysplasia. *Annu Rev Med* 1999;**50**:17–35.
38. Ng E, Adlam D, Keal RP, *et al.* Recurrent ventricular tachycardia of non-ischaemic origin. *J R Soc Med* 2004;**97**:23–5.
39. Verma A, Kilicaslan F, Schweikert RA, *et al.* Short- and long-term success of substrate-based mapping and ablation of ventricular tachycardia in arrhythmogenic right ventricular dysplasia. *Circulation* 2005;**111**:3209–16.
40. Wellens HJ. Radiofrequency catheter ablation of benign ventricular ectopic beats: a therapy in search of a disease? *J Am Coll Cardiol* 1995;**26**:850–1.
41. Globits S, Kreiner G, Frank H, *et al.* Significance of morphological abnormalities detected by MRI in patients undergoing successful ablation of right ventricular outflow tract tachycardia. *Circulation* 1997;**96**:2633–40.
42. Gaita F, Giustetto C, Di Donna P, *et al.* Long-term follow-up of right ventricular monomorphic extrasystoles. *J Am Coll Cardiol* 2001;**38**:364–70.
43. Zweytick B, Pignoni-Mory P, Zweytick G, *et al.* Prognostic significance of right ventricular extrasystoles. *Europace* 2004;**6**:123–9.
44. Lemery R, Brugada P, Bella PD, *et al.* Nonischemic ventricular tachycardia. Clinical course and long-term follow-up in patients without clinically overt heart disease. *Circulation* 1989;**79**:990–9.
45. Duffee DF, Shen WK, Smith HC. Suppression of frequent premature ventricular contractions and improvement of left ventricular function in patients with presumed idiopathic dilated cardiomyopathy. *Mayo Clin Proc* 1998;**73**:430–3.
46. Takemoto M, Yoshimura H, Ohba Y, *et al.* Radiofrequency catheter ablation of premature ventricular complexes from right ventricular outflow tract improves left ventricular dilation and clinical status in patients without structural heart disease. *J Am Coll Cardiol* 2005;**45**:1259–65.
47. Noda T, Shimizu W, Taguchi A, *et al.* Malignant entity of idiopathic ventricular fibrillation and polymorphic ventricular tachycardia initiated by premature extrasystoles originating from the right ventricular outflow tract. *J Am Coll Cardiol* 2005;**46**:1288–94.
48. Viskin S, Rosso R, Rogowski O, *et al.* The “short-coupled” variant of right ventricular outflow ventricular tachycardia: a not-so-benign form of benign ventricular tachycardia? *J Cardiovasc Electrophysiol* 2005;**16**:912–6.
49. Viskin S, Antzelevitch C. The cardiologists’ worst nightmare sudden death from “benign” ventricular arrhythmias. *J Am Coll Cardiol* 2005;**46**:1295–7.
50. Haissaguerre M, Shah DC, Jais P, *et al.* Role of Purkinje conducting system in triggering of idiopathic ventricular fibrillation. *Lancet* 2002;**359**:677–8.
51. Haissaguerre M, Shoda M, Jais P, *et al.* Mapping and ablation of idiopathic ventricular fibrillation. *Circulation* 2002;**106**:962–7.
52. Haissaguerre M, Extramiana F, Hocini M, *et al.* Mapping and ablation of ventricular fibrillation associated with long-QT and Brugada syndromes. *Circulation* 2003;**108**:925–8.

53. Francis J, Sankar V, Nair VK, *et al.* Catecholaminergic polymorphic ventricular tachycardia. *Heart Rhythm* 2005;**2**:550–4.
54. Stevenson WG. Catheter ablation of monomorphic ventricular tachycardia. *Curr Opin Cardiol* 2005;**20**:42–7.
55. Reiter MJ, Reiffel JA. Importance of beta blockade in the therapy of serious ventricular arrhythmias. *Am J Cardiol* 1998;**82**:9I–19I.
56. Sanders GD, Hlatky MA, Owens DK. Cost-effectiveness of implantable cardioverter-defibrillators. *N Engl J Med* 2005;**353**:1471–80.
57. Katritsis DG, Camm AJ. Nonsustained ventricular tachycardia: where do we stand? *Eur Heart J* 2004;**25**:1093–9.
